# Supplementary material for: STIM1 Deficiency Leads to Specific Down-Regulation of ITPR3 in SH-SY5Y Cells
Source: Int J Mol Sci. 2020 Sep 9;21(18):6598. doi: 10.3390/ijms21186598 (PMC7555297; doi:10.3390/ijms21186598)
Supplement: Supplementary file 1 [file ijms-21-06598-s001.xlsx]

## Sheet: Hoja1
							ΔΔCt	Expression Fold Change
#	Assay ID	Gene Symbol	Mean Ct values for WT cells (n=3)	Mean Ct values for KO cells (n=3)	CtWT-CtGAPDH	CtKO-CtGAPDH	CtKO-CtWT	2^-ΔΔCt
1
2	Hs99999905_m1	GAPDH	18.4	18.35	Housekeeping in the assay
3	Hs99999909_m1	HPRT1	23.23	23.15	4.83	4.8	-0.0333333	1.02337
4	Hs99999908_m1	GUSB	24.4407	24.4573	6.04067	6.10707	0.0694193	0.953022
5	Hs00269618_m1	ADCY3	25.066	24.9998	6.66595	6.64958	-0.0133567	1.0093
6	Hs00909568_g1	ATF4	21.9567	22.0576	3.55369	3.70734	0.153659	0.898968
7	Hs01092295_m1	ATP2A1	31.8469	32.2326	13.4439	13.8824	0.438477	0.737913
8	Hs00544877_m1	ATP2A2	22.8022	22.7004	4.39918	4.35017	-0.0490063	1.03455
9	Hs00155949_m1	ATP2B1	25.5603	25.7375	7.15731	7.38727	0.229967	0.852655
10	Hs00205122_m1	ATP2C1	24.3536	24.1826	5.95063	5.83235	-0.118283	1.08544
11	Hs00167681_m1	CACNA1C	28.7726	27.9122	10.37	9.56	-0.81	1.75321
12	Hs00913730_m1	CACNA1F	36.8792	N.A.	N.A.	N.A.	N.A.	N.A.
13	Hs00367969_m1	CACNA1G	26.8867	26.3655	8.48366	8.0153	-0.46836	1.38354
14	Hs01103523_m1	CACNA1H	N.A.	N.A.	N.A.	N.A.	0	N.A
15	Hs00163885_m1	CACNA1S	N.A.	N.A.	N.A.	N.A.	0	N.A
16	Hs00237233_m1	CALM1	20.8134	20.6649	2.41039	2.31468	-0.0957093	1.06859
17	Hs00830212_s1	CALM2	19.4634	19.7112	1.06037	1.99873	0.938359	0.521826
18	Hs00270914_m1	CALM3	21.6532	21.5823	3.25016	3.23211	-0.018051	1.01259
19	Hs00174318_m1	CAMK4	24.3333	24.3611	5.93033	6.01083	0.0804917	0.945735
20	Hs00167901_m1	CD247	N.A.	N.A.	N.A.	N.A.	0	N.A.
21	Hs99999153_m1	CD3E	N.A.	N.A.	N.A.	N.A.	0	N.A.
22	Hs00231713_m1	CREB1	24.5686	24.6627	6.16562	6.31243	0.146814	0.903243
23	Hs00231733_m1	CREBBP	24.1014	23.9719	5.69839	5.62168	-0.0767087	1.05461
24	Hs01076078_m1	EGFR	24.36	24.4849	5.95703	6.13466	0.177629	0.884155
25	Hs00230938_m1	EP300	25.155	24.8085	6.75198	6.45823	-0.293751	1.22582
26	Hs01001580_m1	ERBB2	28.4708	28.3897	10.0678	10.0394	-0.028355	1.01985
27	Hs00266733_m1	GNA11	28.8754	28.9322	10.4724	10.582	0.109584	0.926855
28	Hs01053355_m1	GNAI1	24.645	24.629	6.24195	6.27875	0.0368003	0.974815
29	Hs01064686_m1	GNAI2	21.8549	22.1193	3.45184	3.76902	0.317183	0.802636
30	Hs00197803_m1	GNAI3	23.3732	23.6164	4.97019	5.26612	0.295932	0.814546
31	Hs00221365_m1	GNAO1	23.915	23.4446	5.51194	5.09433	-0.417609	1.33571
32	Hs00387073_m1	GNAQ	23.7688	23.7821	5.3658	5.43189	0.0660973	0.955218
33	Hs00255603_m1	GNAS	18.6935	18.5831	0.29045	0.232874	-0.057576	1.04072
34	Hs00181845_m1	GNB1	20.9071	20.6972	2.50411	2.34697	-0.157138	1.11507
35	Hs00929275_g1	GNB2	20.694	20.6412	2.29099	2.29102	2.56667e-05	0.999982
36	Hs01564092_m1	GNB3	28.3305	28.4046	9.92746	10.0544	0.126909	0.915792
37	Hs00828232_m1	GNG2	23.7121	24.1436	5.30907	5.79334	0.484264	0.714862
38	Hs00609557_m1	GRIN1	25.0449	24.6294	6.64194	6.27921	-0.362726	1.28585
39	Hs00168230_m1	GRIN2B	N.A.	N.A.	N.A.	N.A.	0	N.A.
40	Hs00164803_m1	GUCY2D	N.A.	N.A.	N.A.	N.A.	0	N.A.
41	Hs02621185_s1	HDAC1	24.1588	24.2886	5.75575	5.93836	0.182608	0.881109
42	Hs00231032_m1	HDAC2	22.5367	23.0267	4.13371	4.67647	0.542765	0.686454
43	Hs00187320_m1	HDAC3	24.5491	24.5021	6.14606	6.15188	0.005822	0.995973
44	Hs00195814_m1	HDAC4	27.1239	27.1	8.72089	8.74973	0.0288467	0.980204
45	Hs00195869_m1	HDAC6	25.7613	25.6738	7.35832	7.32359	-0.03473	1.02437
46	Hs00610483_m1	HRAS	24.0962	23.9014	5.69315	5.55116	-0.141988	1.10342
47	Hs00265014_s1	HTR1A	32.7735	30.6813	14.3705	12.331	-2.03945	4.11089
48	Hs00167241_m1	HTR2A	N.A.	N.A.	N.A.	N.A.	0	N.A.
49	Hs00968672_m1	HTR2C	37.5342	38.7068	19.1312	20.3566	1.2254	0.42768
50	Hs00609566_m1	IGF1R	22.1479	22.0398	3.74489	3.68953	-0.055364	1.03912
51	Hs00985639_m1	IL6	N.A.	N.A.	N.A.	N.A.	0	N.A.
52	Hs00181881_m1	ITPR1	24.8277	24.8488	6.42471	6.49857	0.0738617	0.950091
53	Hs00609908_m1	ITPR3	29.0886	30.5784	10.6856	12.2281	1.54259	0.343269
54	Hs00911700_m1	KDR	34.5696	34.2362	16.1666	15.8859	-0.280674	1.21476
55	Hs00174029_m1	KIT	28.7154	29.0019	10.3124	10.6516	0.339224	0.790467
56	Hs00364282_m1	KRAS	25.628	25.8444	7.22502	7.49422	0.269195	0.829782
57	Hs01050409_m1	MEF2A	26.1001	26.0604	7.69706	7.71017	0.0131103	0.990954
58	Hs00231149_m1	MEF2C	27.0746	26.8614	8.67164	8.51113	-0.160512	1.11768
59	Hs00954735_m1	MEF2D	25.3241	25.3629	6.92112	7.01271	0.0915913	0.938487
60	Hs00232437_m1	NFAT5	24.9589	24.6526	6.55589	6.30238	-0.253514	1.19211
61	Hs00542678_m1	NFATC1	36.9667	36.5791	18.5636	18.2289	-0.334785	1.26119
62	Hs00905451_m1	NFATC2	N.A.	N.A.	N.A.	N.A.	0	N.A.
63	Hs00190046_m1	NFATC3	23.8233	23.8177	5.42033	5.46749	0.0471567	0.967842
64	Hs00190037_m1	NFATC4	26.5336	27.3204	8.13059	8.9702	0.83961	0.558795
65	Hs00418568_m1	NPR1	34.134	35.2325	15.731	16.8823	1.15126	0.450231
66	Hs00241516_m1	NPR2	28.4693	28.5659	10.0663	10.2157	0.149397	0.901627
67	Hs00180035_m1	NRAS	23.142	23.1951	4.73896	4.84488	0.105916	0.929215
68	Hs00248563_m1	PLCB1	26.4685	26.4773	8.0655	8.1271	0.0615963	0.958203
69	Hs00190117_m1	PLCB2	31.807	31.5794	13.404	13.2292	-0.17475	1.12877
70	Hs00184504_m1	PLCB3	25.6046	25.5744	7.20162	7.22414	0.0225273	0.984507
71	Hs00196502_m1	PLCD1	28.6699	28.9342	10.2669	10.584	0.317064	0.802702
72	Hs00275279_m1	PLCE1	28.2136	29.0842	9.81059	10.7339	0.923347	0.527284
73	Hs00234046_m1	PLCG1	24.5901	24.6082	6.18706	6.25798	0.0709143	0.952034
74	Hs00182192_m1	PLCG2	N.A.	N.A.	N.A.	N.A.	0	N.A.
75	Hs00174223_m1	PPP3CA	24.9414	25.0537	6.53839	6.70344	0.165054	0.891895
76	Hs01547793_m1	PPP3R1	23.5895	23.6222	5.18653	5.27201	0.0854747	0.942474
77	Hs00176973_m1	PRKCA	24.9661	24.8122	6.56313	6.46192	-0.101211	1.07267
78	Hs00176998_m1	PRKCB	N.A.	N.A.	N.A.	N.A.	0	N.A.
79	Hs01090047_m1	PRKCD	27.9267	28.0073	9.52371	9.65702	0.133318	0.911732
80	Hs00178455_m1	PRKCE	27.8564	27.3932	9.45337	9.043	-0.410366	1.32902
81	Hs00177051_m1	PRKCZ	24.8707	24.5407	6.46768	6.19051	-0.277165	1.21181
82	Hs01077088_m1	QDPR	24.3722	24.4899	5.96922	6.13963	0.170412	0.888589
83	Hs00196699_m1	RRAS	28.0609	29.1054	9.65787	10.7552	1.09733	0.46738
84	Hs00166991_m1	RYR1	37.1276	36.3174	18.7246	17.9672	-0.757418	1.69046
85	Hs00181461_m1	RYR2	30.6284	31.1496	12.2254	12.7994	0.573961	0.67177
86	Hs00253432_m1	SLC8A1	N.A.	N.A.	N.A.	N.A.	0	N.A.
87	Hs00300047_m1	SLC9A1	27.9315	27.9932	9.52849	9.64301	0.114521	0.923689
88	Hs00903842_m1	SLC9A3	N.A.	N.A.	N.A.	N.A.	0	N.A.
89	Hs00178494_m1	SRC	22.7698	22.8352	4.36674	4.48494	0.118197	0.921338
90	Hs00998133_m1	TGFB1	25.6309	25.934	7.22793	7.58372	0.355796	0.781438
91	Hs00608195_m1	TRPC1	26.4946	26.8451	8.09157	8.49489	0.403315	0.756119
92	Hs00162985_m1	TRPC3	31.3008	32.5121	12.8978	14.1618	1.264	0.416387
93	Hs00395102_m1	TRPC6	N.A.	N.A.	N.A.	N.A.	0	N.A.
94	Hs00218912_m1	TRPV1	29.2569	29.1344	10.8539	10.7841	-0.0697387	1.04953
95	Hs00367960_m1	TRPV6	N.A.	N.A.	N.A.	N.A.	0	N.A.
96	Hs00900055_m1	VEGFA	24.6865	24.6308	6.28351	6.28053	-0.00297467	1.00206
*N.A. = not available or non-detected

## Sheet: Hoja2
	WT1	WT2	WT3	Mean		KO1	KO2	KO3	Mean
GUSB	24.3966	24.3593	24.5661	24.4407		24.4323	24.4787	24.4609	24.4573
ADCY3	24.9446	25.0334	25.2199	25.066		24.969	25.0053	25.0251	24.9998
ATF4	21.9033	21.8959	22.071	21.9567		22.0093	22.0843	22.0791	22.0576
ATP2A1	31.7191	31.9791	31.8427	31.8469		32.134	32.3091	32.2548	32.2326
ATP2A2	22.8279	22.7947	22.7839	22.8022		22.6697	22.6934	22.7382	22.7004
ATP2B1	25.511	25.461	25.7089	25.5603		25.6726	25.745	25.795	25.7375
ATP2C1	24.3345	24.248	24.4784	24.3536		24.1369	24.1607	24.2501	24.1826
CACNA1C	28.7137	28.7578	28.8464	28.7726		27.7574	27.9763	28.003	27.9122
CACNA1F	36.3915	37.2757	36.9706	36.8792		Undetermined	36.8443	37.3097	#VALUE!
CACNA1G	26.8007	26.8022	27.0572	26.8867		26.1748	26.4607	26.4611	26.3655
CACNA1H	Undetermined	Undetermined	Undete	#VALUE!		Undetermined	Undetermined	Undete	#VALUE!
CACNA1S	37.9109	Undetermined	Undet	#VALUE!		Undetermined	Undetermined	Undete	#VALUE!
CALM1	20.8109	20.8446	20.7847	20.8134		20.649	20.67	20.6757	20.6649
CALM2	19.5966	19.5233	19.2703	19.4634		19.6276	19.7262	19.7798	19.7112
CALM3	21.5257	21.6211	21.8126	21.6532		21.5631	21.6394	21.5445	21.5823
CAMK4	24.4159	24.168	24.4161	24.3333		24.3301	24.3369	24.4161	24.3611
CD247	Undetermined	Undetermined	Undete	#VALUE!		Undetermined	Undetermined	Undet	#VALUE!
CD3E	Undetermined	Undetermined	Undete	#VALUE!		Undetermined	Undetermined	Undete	#VALUE!
CREB1	24.4785	24.555	24.6724	24.5686		24.5864	24.7175	24.684	24.6627
CREBBP	23.9793	24.0539	24.271	24.1014		23.9644	23.9225	24.0289	23.9719
EGFR	24.2237	24.3533	24.5031	24.36		24.424	24.503	24.5277	24.4849
EP300	25.0633	25.0514	25.3503	25.155		24.6139	24.9085	24.903	24.8085
ERBB2	28.5014	28.3166	28.5944	28.4708		28.3504	28.3804	28.4381	28.3897
GNA11	28.8143	28.8438	28.9681	28.8754		28.8725	28.9623	28.9618	28.9322
GNAI1	24.5954	24.6145	24.725	24.645		24.5588	24.6561	24.672	24.629
GNAI2	21.7799	21.7601	22.0246	21.8549		22.0928	22.1176	22.1474	22.1193
GNAI3	23.3148	23.3027	23.5022	23.3732		23.5417	23.7443	23.563	23.6164
GNAO1	23.7992	23.8514	24.0943	23.915		23.3941	23.4705	23.4691	23.4446
GNAQ	23.6864	23.7704	23.8497	23.7688		23.8211	23.7308	23.7944	23.7821
GNAS	18.6217	18.6064	18.8523	18.6935		18.5961	18.568	18.5852	18.5831
GNB1	20.7802	20.8785	21.0627	20.9071		20.6425	20.6676	20.7816	20.6972
GNB2	20.5846	20.602	20.8955	20.694		20.6103	20.659	20.6545	20.6412
GNB3	28.181	28.3196	28.4908	28.3305		28.3112	28.4294	28.4732	28.4046
GNG2	23.6829	23.6398	23.8136	23.7121		23.9549	24.2076	24.2682	24.1436
GRIN1	24.9251	24.9897	25.2201	25.0449		24.591	24.6725	24.6248	24.6294
GRIN2B	Undetermined	Undetermined	Undete	#VALUE!		Undetermined	Undetermined	Undete	#VALUE!
GUCY2D	37.8358	39.7244	39.3036	38.9546		Undetermined	38.7491	39.7692	#VALUE!
HDAC1	24.0615	24.1309	24.2838	24.1588		24.2487	24.3116	24.3054	24.2886
HDAC2	22.4947	22.5202	22.5952	22.5367		23.0088	23.0135	23.0579	23.0267
HDAC3	24.4608	24.5615	24.6249	24.5491		24.4652	24.5335	24.5076	24.5021
HDAC4	27.0287	27.0569	27.286	27.1239		27.0842	27.1211	27.0946	27.1
HDAC6	25.7201	25.64	25.9239	25.7613		25.6513	25.6467	25.7234	25.6738
HRAS	24.0075	23.9824	24.2986	24.0962		23.8791	23.9047	23.9204	23.9014
HTR1A	33.1303	32.2504	32.9399	32.7735		30.6603	30.6	30.7835	30.6813
HTR2A	Undetermined	Undetermined	Undete	#VALUE!		Undetermined	36.316	Undet	#VALUE!
HTR2C	37.8352	37.2997	37.4678	37.5342		39.2739	39.0676	37.779	38.7068
IGF1R	21.9867	22.0929	22.3641	22.1479		22.0119	22.0979	22.0095	22.0398
IL6	Undetermined	Undetermined	Undete	#VALUE!		Undetermined	Undetermined	Undete	#VALUE!
ITPR1	24.775	24.7461	24.9621	24.8277		25.1366	24.6835	24.7262	24.8488
ITPR3	28.9209	29.1501	29.1948	29.0886		30.2857	30.6985	30.751	30.5784
KDR	34.3131	35.2962	34.0996	34.5696		33.9727	34.0849	34.6509	34.2362
KIT	28.6242	28.6798	28.8423	28.7154		28.9848	28.98	29.0409	29.0019
KRAS	25.6457	25.5624	25.676	25.628		25.8189	25.8205	25.894	25.8444
MEF2A	26.19	26.0564	26.0538	26.1001		25.9691	26.0954	26.1167	26.0604
MEF2C	26.9073	27.1102	27.2065	27.0746		26.8318	26.8691	26.8833	26.8614
MEF2D	25.2707	25.2395	25.4622	25.3241		25.27	25.3323	25.4865	25.3629
NFAT5	24.8361	24.9092	25.1314	24.9589		24.6981	24.5574	24.7023	24.6526
NFATC1	36.1776	37.5338	37.1886	36.9667		37.398	36.2954	36.0438	36.5791
NFATC2	35.0644	35.4497	36.8926	35.8022		Undetermined	Undetermined	Undete	#VALUE!
NFATC3	23.7664	23.8199	23.8837	23.8233		23.7866	23.8289	23.8377	23.8177
NFATC4	26.5037	26.5144	26.5826	26.5336		27.2902	27.3025	27.3686	27.3204
NPR1	34.1232	34.1972	34.0817	34.134		35.1266	34.9125	35.6584	35.2325
NPR2	28.4592	28.4714	28.4772	28.4693		28.4901	28.6018	28.6058	28.5659
NRAS	23.0757	23.0926	23.2576	23.142		23.1367	23.1761	23.2726	23.1951
PLCB1	26.3651	26.3914	26.649	26.4685		26.4163	26.4648	26.5509	26.4773
PLCB2	31.8137	31.8654	31.7418	31.807		31.41	31.6866	31.6417	31.5794
PLCB3	25.5529	25.5581	25.7029	25.6046		25.4816	25.6348	25.6067	25.5744
PLCD1	28.661	28.5569	28.7918	28.6699		28.9759	28.9488	28.8779	28.9342
PLCE1	28.2102	28.1536	28.277	28.2136		29.0813	28.9968	29.1744	29.0842
PLCG1	24.4727	24.511	24.7865	24.5901		24.5639	24.6481	24.6127	24.6082
PLCG2	Undetermined	Undetermined	39.1004	#VALUE!		38.9269	Undetermined	Undetermined	#VALUE!
PPP3CA	24.9123	24.8988	25.0131	24.9414		25.016	25.0404	25.1046	25.0537
PPP3R1	23.5966	23.6028	23.5692	23.5895		23.5681	23.642	23.6566	23.6222
PRKCA	24.9159	24.9735	25.009	24.9661		24.7798	24.8686	24.788	24.8122
PRKCB	Undetermined	Undetermined	38.2388	#VALUE!		35.5613	35.9501	38.2689	36.5934
PRKCD	27.9466	27.7591	28.0744	27.9267		27.9546	27.9793	28.0878	28.0073
PRKCE	27.9043	27.7838	27.881	27.8564		27.2953	27.4494	27.4349	27.3932
PRKCZ	24.754	24.8814	24.9767	24.8707		24.4976	24.5437	24.5809	24.5407
QDPR	24.2709	24.3486	24.4972	24.3722		24.4189	24.5058	24.5449	24.4899
RRAS	27.9161	28.0914	28.1751	28.0609		28.9734	29.1368	29.2061	29.1054
RYR1	37.1708	37.8669	36.3452	37.1276		36.2152	36.5437	36.1934	36.3174
RYR2	30.4592	30.6715	30.7545	30.6284		31.2964	31.1975	30.9549	31.1496
SLC8A1	39.1846	Undetermined	Undetermined	#VALUE!		Undetermined	Undetermined	Undetermined	#VALUE!
SLC9A1	27.8448	27.955	27.9947	27.9315		27.9135	28.0226	28.0436	27.9932
SLC9A3	38.3497	Undetermined	38.5307	#VALUE!		38.463	Undetermined	37.5855	#VALUE!
SRC	22.699	22.7207	22.8895	22.7698		22.809	22.8347	22.8618	22.8352
TGFB1	25.5472	25.5434	25.8022	25.6309		25.851	25.957	25.9939	25.934
TRPC1	26.5327	26.5962	26.3549	26.4946		26.7956	26.8559	26.8839	26.8451
TRPC3	31.137	31.3948	31.3708	31.3008		32.4381	32.0199	33.0782	32.5121
TRPC6	Undetermined	Undetermined	Undetermined	#VALUE!		Undetermined	Undetermined	Undetermined	#VALUE!
TRPV1	29.2655	29.1387	29.3664	29.2569		29.052	29.1518	29.1994	29.1344
TRPV6	Undetermined	Undetermined	Undetermined	#VALUE!		Undetermined	Undetermined	Undetermined	#VALUE!
VEGFA	24.5878	24.6324	24.8394	24.6865		24.5438	24.6767	24.6718	24.6308
